# Supplementary material
Source: publisher figshare collection journal article supplement (https://acs.figshare.com/ndownloader/files/9521185)
Supplement: Supplementary file 1 [file 9521185]

## **Supporting Information**

### **Investigation of Antibacterial 1,8-Cineole-Derived Thin Films Formed via Plasma Enhanced Chemical Vapor Deposition**

Michelle N. Mann<sup>1</sup> and Ellen R. Fisher<sup>1\*</sup>

<sup>1</sup>Department of Chemistry, Colorado State University, Fort Collins, Colorado 80523-1872,  
United States

\*Author to whom correspondence should be addressed: [Ellen.Fisher@colostate.edu](mailto:Ellen.Fisher@colostate.edu)

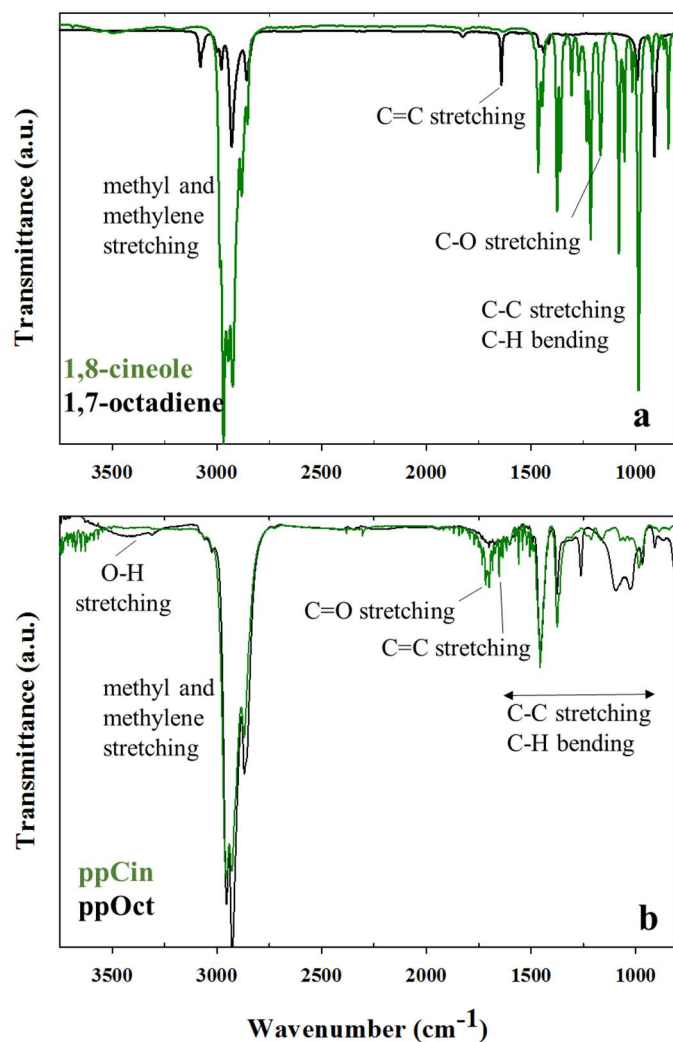

**Figure S1.** Representative FTIR spectra for (a) cineole and octadiene monomers (b) ppCin and ppOct films. Note peak intensities should not be compared between samples as neither monomer nor film thickness was controlled.

**Table S1.** WCA of Plasma-Polymerized Films Over 2 Month Aging Period<sup>a</sup>

|                            | <b>Pressure<br/>(mTorr)</b> | <b>Power<br/>(W)</b> | <i>fresh</i> | <i>1 day</i> | <i>1 week</i> | <i>2 weeks</i> | <i>1 month</i> | <i>2 months</i> |
|----------------------------|-----------------------------|----------------------|--------------|--------------|---------------|----------------|----------------|-----------------|
| ppCin                      | 15                          | 50                   | 54.3 ± 4.1°  | 58.6 ± 1.2°  | 59.7 ± 2.0°   | 61.0 ± 3.3     | 62.1 ± 2.2     | 63.9 ± 1.5°     |
|                            | 30                          | 30                   | 74.4 ± 1.5°  | 73.8 ± 0.6°  | 73.0 ± 1.3°   | 71.9 ± 1.6°    | 78.2 ± 1.6°    | 75.7 ± 1.9°     |
|                            | 30                          | 50                   | 68.0 ± 1.5°  | 72.9 ± 1.0°  | 75.1 ± 0.6°   | 71.8 ± 2.6°    | 78.1 ± 1.5°    | 76.1 ± 0.6°     |
|                            | 100                         | 25                   | 86.3 ± 1.4°  | 84.0 ± 1.4°  | 82.3 ± 1.7°   | 82.4 ± 1.0°    | 82.4 ± 1.1°    | 80.6 ± 0.6°     |
|                            | 100                         | 50                   | 86.5 ± 1.7°  | 86.5 ± 0.9°  | 82.4 ± 1.1°   | 80.7 ± 1.2°    | 80.9 ± 0.2°    | 83.0 ± 1.0°     |
|                            | 100                         | 100                  | 85.6 ± 1.1°  | 85.1 ± 1.2°  | 81.3 ± 0.5°   | 79.8 ± 1.0°    | 81.3 ± 0.8°    | 81.7 ± 1.7°     |
| Treated <sup>b</sup> ppCin | 15                          | 50                   | 20.4 ± 1.2°  | 34.5 ± 0.9°  | 42.1 ± 0.6°   | 43.1 ± 0.6°    | 44.5 ± 0.7°    | 44.1 ± 1.0°     |
| ppOct                      | 100                         | 25                   | 93.7 ± 1.4°  | 90.3 ± 0.8°  | 85.2 ± 0.6°   | 85.0 ± 1.0°    | 83.1 ± 1.4°    | 82.1 ± 1.5°     |

<sup>a</sup> all depositions completed on glass placed 10 cm downstream from coil region for 5 min except for ppOct (10 min). Values represent the average and standard deviation of  $n \geq 9$

<sup>b</sup> H<sub>2</sub>O<sub>(v)</sub> plasma operating at 50 mTorr and 20 W for 2 min
